# Genome analysis leads to discovery of Quorum Sensing Genes in *Cedecea neteri*

Kian-Hin Tan<sup>1</sup> and Kok-Gan Chan<sup>1</sup> \*

<sup>1</sup>Division of Genetics and Molecular Biology, Institute of Biological Sciences, Faculty of Science, University of Malaya, 50603 Kuala Lumpur, Malaysia

\* **Correspondence:** Kok-Gan Chan, Division of Genetics and Molecular Biology, Institute of Biological Sciences, Faculty of Science, University of Malaya, 50603 Kuala Lumpur, Malaysia. kokgan@um.edu.my

## Abstract

We have identified a strain of *C. neteri* SSMD04 isolated from pickled mackerel sashimi that produced *N*-acyl-homoserine lactone (AHL) type quorum sensing (QS) activity. Tandem mass spectrometry revealed that *C. neteri* SSMD04 produced *N*-butyryl-homoserine lactone (C4-HSL). We identified a pair of *luxIR* homologues in this genome that shares the highest similarity with *croIR* from *Citrobacter rodentium*. The AHL synthase, which we named it as *cneI* (636 bp) and at 8bp distance from *cneI* is a sequence encoding a hypothetical protein, potentially the cognate receptor, a *luxR* homologue which we named it as *cneR*. We also found an orphan *luxR* in this isolate. To our knowledge, this is the first report on the AHL production activity in *C. neteri*, discovery of its *luxI/R* homologues and the orphan receptor.

## 1. Introduction

*Cedecea* spp. are extremely rare Gram-negative bacteria that belong to the *Enterobacteriaceae* family (Berman, 2012). This genus is lipase-positive and resistant to colistin and cephalothin. The name *Cedecea* was coined by P. A. D. Grimont and F. Grimont, from the abbreviation of the Centers for Disease Control (CDC) (Grimont, Grimont & Farmer, 1981). Originally recognized as Enteric group 15, this genus is comprised of five species, out of which only three were named, *C. neteri*, *C.*

*lapagei*, *C. davisae*, and the other two are known as *Cedecea* species 3 and *Cedecea* species 5 (Brenner et al., 2005).

*Cedecea* species 4 was given the name *C. neteri* in 1982 when its clinical significance was reported. The name ‘*neteri*’ was coined to honor Erwin Neter, an American physician-microbiologist for his contributions in the work on *Enterobacteriaceae* in human disease (Farmer III et al., 1982). *C. neteri* was also found in a patient with systemic lupus erythematosus where it led to the patient’s death (Aguilera et al., 1995). Even though it was evident that *C. neteri* can act as human pathogen, its etiology is unknown and limited studies have been conducted on *Cedecea* spp. There were cases of isolation of *Cedecea* spp. from other sources except human (Jang & Nishijima, 1990; Osterblad et al., 1999), and we have recently reported the isolation of *C. neteri* SSMD04 from *Shime saba* (Chan et al., 2014), a Japanese cuisine that involves marinating with salt and rice vinegar, enabling the usually perishable *saba* (mackerel) to be enjoyed in the form of *Sashimi* (raw fish).

Bacteria demonstrate a concerted gene regulation mechanism termed ‘Quorum Sensing’ (QS) that relies on the population density of the bacteria (Fuqua, Winans & Greenberg, 1996; Miller & Bassler, 2001; Schauder & Bassler, 2001). The mechanism of QS involves the production, release, detection, and response to small diffusible molecules known as autoinducers, such as *N*-acyl homoserine lactones (AHLs) commonly employed by Gram negative bacteria (Chhabra et al., 2005; Williams et al., 2007). AHL molecules are generally characterized by the length and saturation of its acyl side chains which can vary from 4 to 18 carbons (Pearson, Van Delden & Iglewski, 1999), as well as the R-group substitution at the third carbon (Pearson, Van Delden & Iglewski, 1999; Waters & Bassler, 2005). QS has been shown to play a role in the regulation of a wide range of phenotypes, such as antibiotic biosynthesis, biofilm formation, pathogenesis, bioluminescence, antibiotic production and more (Fuqua, Winans & Greenberg, 1996; Salmond et al., 1995; de Kievit & Iglewski, 2000, Hastings & Nealson, 1977; Bainton et al., 1992; Eberl et al., 1996).

## **2. Materials and methods**

### **2.1. Sample collection and processing**

*Shime saba sashimi* sample was collected from a local supermarket in Malaysia and processed within half an hour following collection. Five grams of sample was stomached and homogenized in 50 ml of peptone water and then spread on MacConkey (MAC) agar. The culture plates were incubated overnight in 28 °C.

## 2.2 Bacterial strains, media and culture conditions

*C. neteri* SSMD04, *Chromobacterium violaceum* CV026, *Erwinia carotovora* GS101 and *E. carotovora* PNP22 were maintained in Luria Bertani (LB) medium at 28 °C. *lux*-based biosensor *Escherichia coli* [pSB401] was grown in LB supplemented with tetracycline (20 µg/mL) at 37 °C. All broth cultures were incubated with shaking (220 rpm).

## 2.3 Species identification of isolate SSMD04

### 2.3.1 16S rDNA phylogenetic analysis

16S rDNA sequence was extracted from the complete genome sequence of isolate SSMD04, while other 16S rDNA sequences of *Cedecea*. spp. were retrieved from GenBank. The Molecular Evolutionary Genetics Analysis (MEGA) 6.0 (Tamura et al., 2013) was used to align the sequences and construct a Maximum likelihood tree using 1,000 bootstrap replications.

### 2.3.2 Biolog GEN III microbial identification system

Microbial identification using Biolog GEN III MicroPlate™ was carried out according to manufacturer's protocol. In brief, overnight culture of *C. neteri* SSMD04 grown on Tryptic Soy Agar (TSA) was used to inoculate inoculating fluid (IF) A to a cell density of 90-98% transmittance. The inoculum was then pipetted into each well of the MicroPlate™ (100 µL per well) and incubated at 28 °C for 24 hrs. The MicroPlate was then read using Biolog's Microbial Identification Systems software where the wells will be scored as 'negative' or 'positive' based on the colour change due to the reduction of tetrazolium redox dyes. This 'Phenotypic Fingerprint' was then used to identify the bacteria by matching it against the database in the system.

83

## 84 **2.4 Detection of AHL production in *C. neteri* SSMD04**

85 AHL-type QS activity of *C. neteri* SSMD04 was screened using biosensor *C. violaceum* CV026. This  
86 is performed by cross streaking *C. neteri* SSMD04 against *C. violaceum* CV026. *E. carotovora*  
87 GS101 and *E. carotovora* PNP22 were used as positive and negative controls, respectively (McClean  
88 et al., 1997).

89

## 90 **2.5 AHL extraction**

91 *C. neteri* SSMD04 was cultured overnight at 28 °C in LB broth (100 mL) supplemented with 50 mM  
92 of 3-(N-morpholino)propanesulfonic acid (MOPS) (pH5.5). Spent supernatant was collected by  
93 centrifugation and subsequently extracted twice with equal volume of acidified ethyl acetate (AEA)  
94 (0.1 % v/v glacial acetic acid). The extracts were air dried and reconstituted in 1 mL of AEA,  
95 transferred into sterile microcentrifuge tubes and air dried again, before being stored at -20 °C. The  
96 extracts were later used for detection of AHL by *lux*-based biosensor *E. coli* [pSB401] as well as  
97 triple quadrupole LC/MS.

98

## 99 **2.6 AHL identification by triple quadrupole LC/MS**

100 Extracts from section 2.5 were reconstituted in acetonitrile (ACN) prior to LC/MS analysis as  
101 described before (Lau et al., 2013) with slight modification. In brief, mobile phase A used was water  
102 with 0.1 % v/v formic acid and mobile phase B used was ACN with 0.1 % formic acid. The flow rate  
103 used was 0.5 mL/min. The gradient profile was set to: A:B 80:20 at 0 min, 50:50 at 7 min, 50:50 at  
104 7.10 min, 80:20 at 12 min, 80:20 at 12.10 min, 20:80 at 14 min, 20:80 at 14.10 min. Precursor ion  
105 scan mode was carried out in positive ion mode with Q1 set to monitor *m/z* 90 to *m/z* 400 and Q3 set  
106 to monitor for *m/z* 102. ACN was also used as a blank.

107

## 108 **2.7 Measurement of bioluminescence**

*E. coli* [pSB401] (Winson et al., 1998) was used as biosensor for the detection of exogenous short chain AHLs present in the extracts. The biosensor strain was cultured in LB broth supplemented with tetracycline (20 µg/mL). The overnight culture was then diluted to an OD<sub>600</sub> of 0.1 with fresh LB broth with tetracycline. The diluted *E. coli* culture was used to resuspend the extracts from section 2.5, prior to being dispensed into a 96-well optical bottom microtitre plate. Cell density bioluminescence measurements were carried out by Infinite M200 luminometer-spectrophotometer (Tecan, Männedorf, Switzerland) over a period of 24 hours. Diluted *E. coli* culture without extracts was read for normalization and sterile broth was used as negative control. The results were displayed as relative light units (RLU)/OD<sub>495</sub> nm against incubation time.

## 2.8 Genome annotation and analysis

Whole genome of *C. neteri* SSMD04 was annotated by RAST as described (Chan et al., 2014). DNAPlotter (Carver et al., 2009) was used to construct GC plot and GC skew.

## 3. Results

### 3.1. Species identification of *C. neteri* SSMD04

16S rDNA sequence retrieved from whole genome sequence of *C. neteri* SSMD04 was used to construct a phylogenetic tree with other sequences of *Cedecea* spp. available in GenBank. 16S rDNA sequence of *C. neteri* SSMD04 clusters with other *C. neteri* strains in a monophyletic clade (Figure 1). However, it can also be observed that the available 16S rDNA sequences of *C. davisae* formed two distinct clusters, of which one is more closely related to *C. neteri* and the other *C. lapagei*.

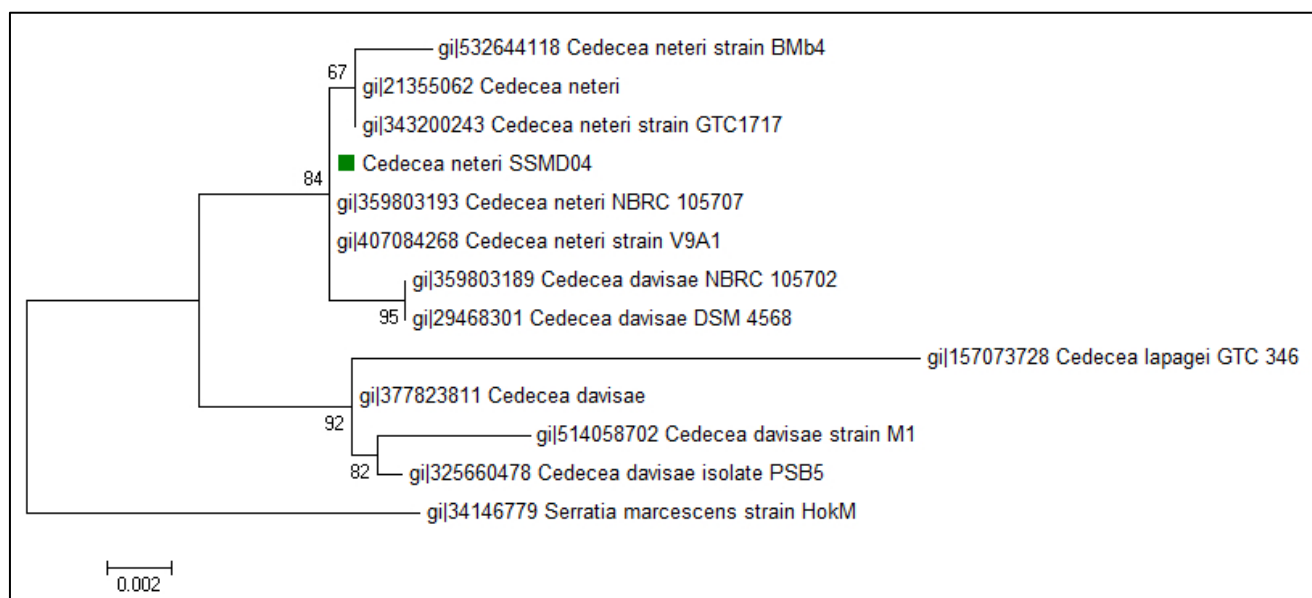

**Figure 1.** Phylogenetic tree showing the position of *C. neteri* SSMD04 (green square) relative to other *Cedecea* spp. The neighbour joining tree was inferred from 1,297 aligned positions of the 16S rDNA sequences using Hasegawa-Kishino-Yano substitution model. Bootstrap values are represented at the branch point. The scale denotes the number of substitutions per nucleotide position. *Serratia marcescens* strain HokM was used as an outgroup.

Biology Gen III microbial identification system was also used to assess the identity of *C. neteri* SSMD04 biochemically. The system identified this strain to be *C. neteri* with a probability and similarity of 0.697. The positive reaction in sucrose well and D-sorbitol well agrees with the report of Farmer III et al., 1982.

### 3.2 Detection of AHL-type QS activity in *C. neteri* SSMD04 using AHL biosensor

*C. neteri* SSMD04 was streaked on LBA against biosensor *C. violaceum* CV026. Short chain AHLs produced from *C. neteri* SSMD04 diffused passively towards the biosensor, activating the production of purple colour pigment, violacein. The result shown in Figure 2 indicated the presence of exogenous AHLs in *C. neteri* SSMD04 culture.

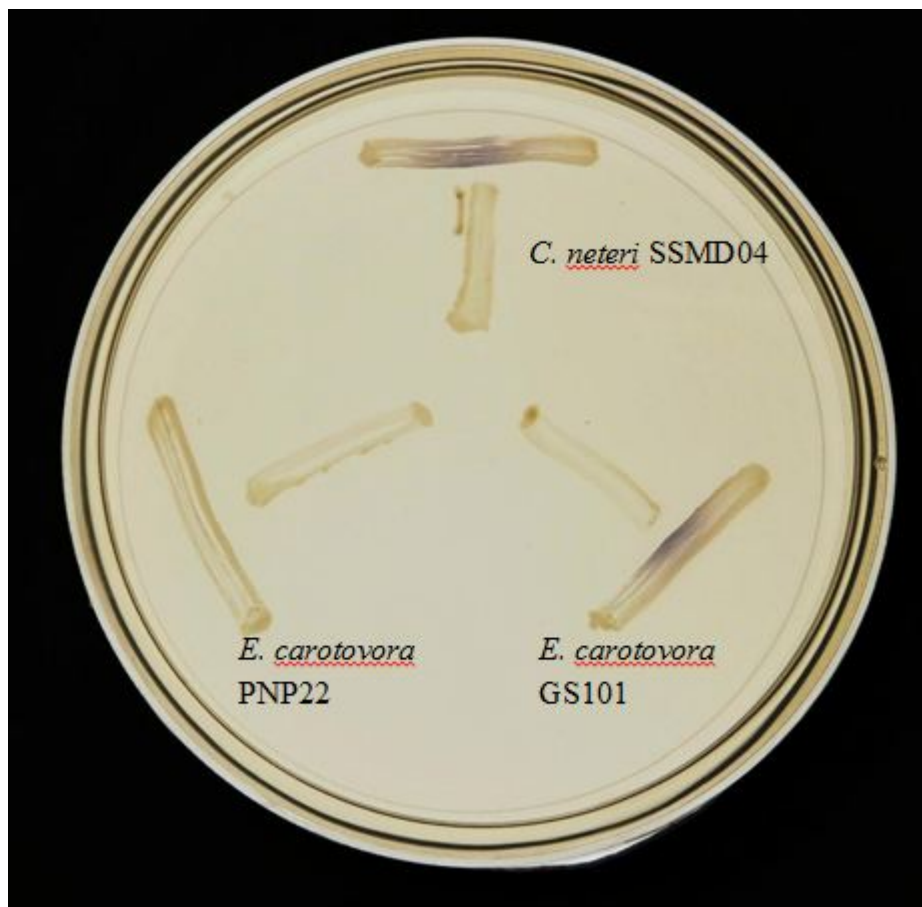

**Figure 2.** Screening for AHL-type QS activity of *C. neteri* SSMD04 using the biosensor *C. violaceum* CV026. *E. carotovora* PNP22 and *E. carotovora* GS101 act as negative and positive controls, respectively.

### 3.3 Measurement of bioluminescence

*C. neteri* SSMD04 also activated *lux*-based biosensor *E. coli* [pSB401] which produces bioluminescence in the presence of short chain AHLs (Figure 3).

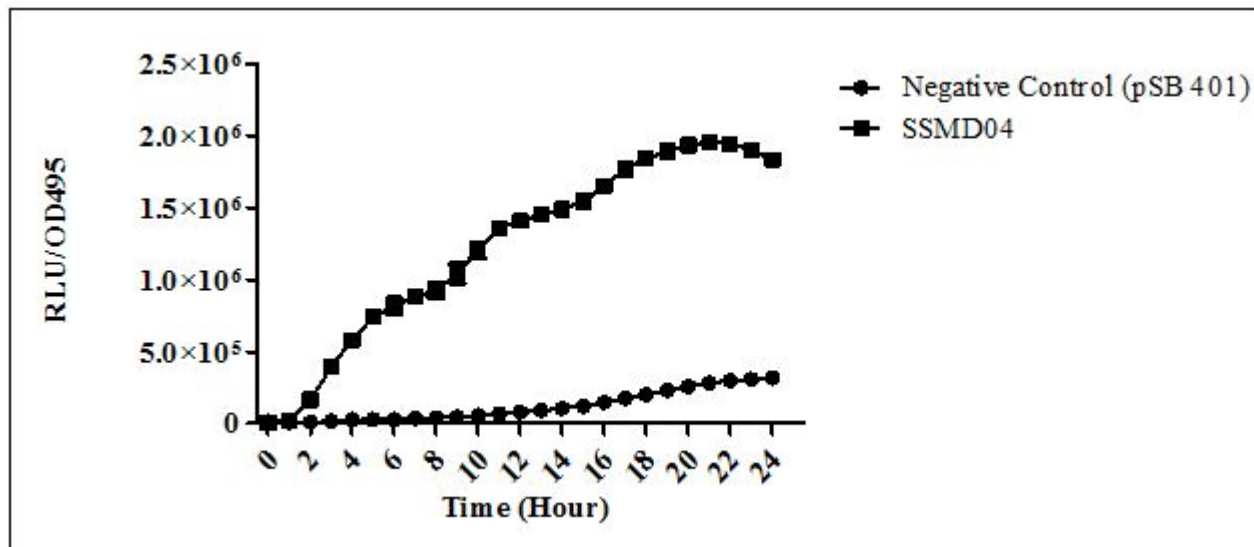

**Figure 3.** Relative light unit (RLU)/OD495 against incubation time of cultures of *E. coli* [pSB401] in the presence of extracted AHLs (square plots) and negative control (circle plots).

### 3.4 AHL identification by triple quadrupole LC/MS

The extracted-ion chromatogram (EIC) generated from the triple quadrupole LC/MS system showed a peak with the same retention time as that of the synthetic *N*-butyryl-homoserine lactone (C4-HSL) standard, which was constantly present in all three replicates (Figure 4). Analysis of the mass spectrum (MS) data revealed the presence of a peak with mass-to-charge ratio ( $m/z$ ) of 172 (Figure 5), which is consistent with the previously reported value (Ortori et al., 2011). This implication was strengthened by the presence of a product ion peak ( $m/z = 102$ ).



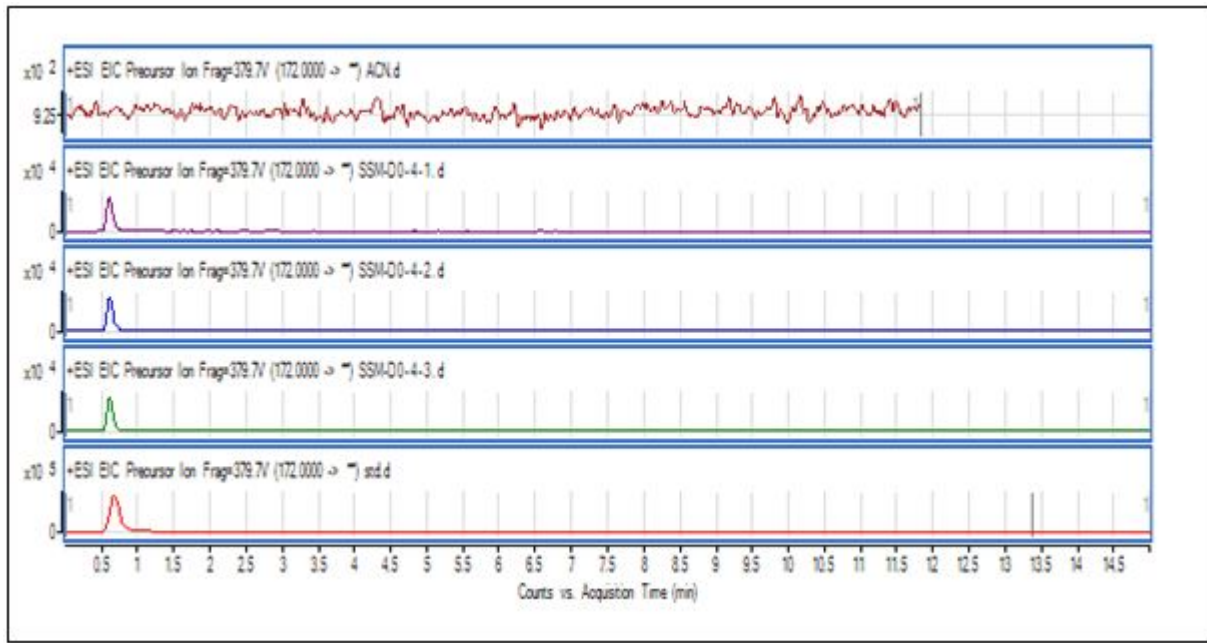

**Figure 4.** EIC of *C. neteri* SSMD04 extract. The data represented three replicates of the extract against synthetic C4-HSL. ACN was used as blank.

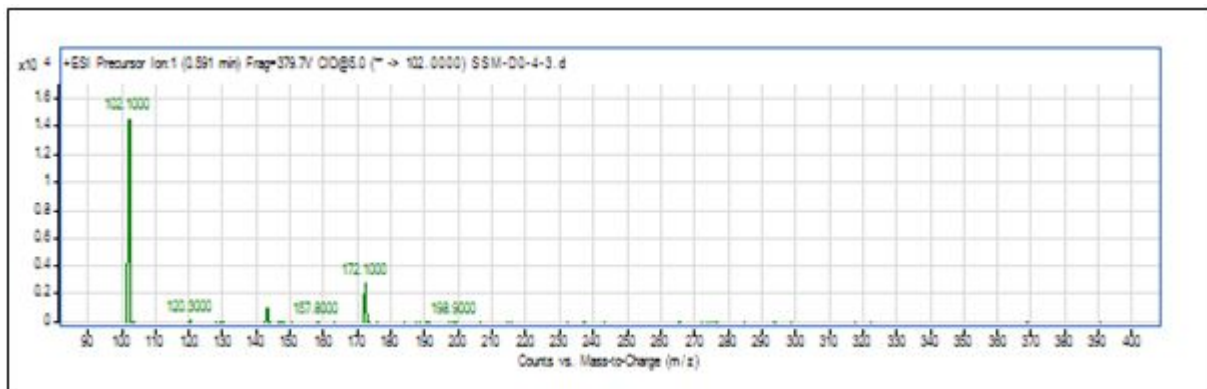

hereafter named *cneI*, was found in the genome. This gene shares 70 % base pair similarity with *N*-acyl homoserine lactone synthase *croI* of *Citrobacter rodentium* ICC168. Analysis of amino acid sequence of *cneI* using InterPro (Mitchell et al., 2015) identified the presence of an acyl-CoA-*N*-acyltransferase, the structural domain of *N*-acyl homoserine lactone synthetases (Gould, Schweizer and Churchill, 2004; Watson et al., 2002).

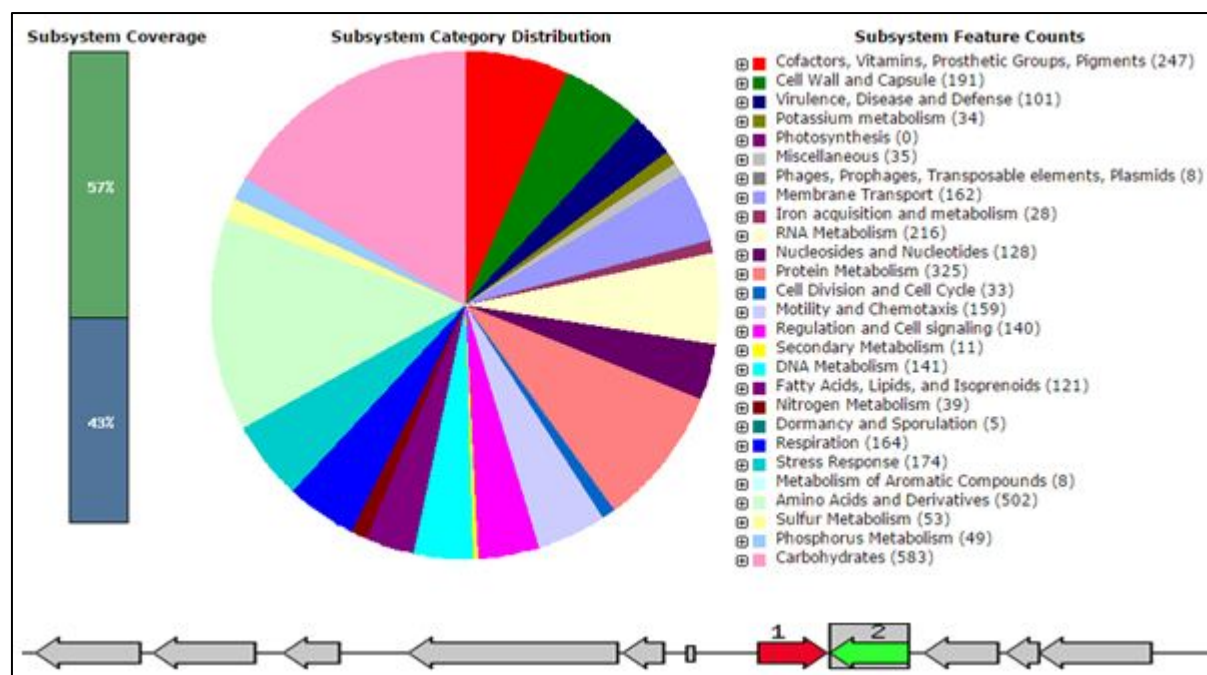

**Figure 6.** From left to right: Alkanesulfonate utilization operon LysR-family regulator Cbl; Nitrogen assimilation regulatory protein Nac; Membrane protein, suppressor for copper-sensitivity ScsD; Membrane protein, suppressor for copper-sensitivity ScsB; Suppression of copper sensitivity: putative copper binding protein ScsA; tRNA-Asn-GTT; LuxI homologue protein; LuxR homologue protein; Oxygen-insensitive NAD(P)H nitroreductase/ Dihydropteridine reductase; hypothetical protein; Bifunctional protein: zinc-containing alcohol dehydrogenase/ quinone oxidoreductase (NADPH: quinone reductase).

Adjacent to *cneI*, 8 bp away, is a sequence encoding a hypothetical protein, potentially the cognate receptor, a *luxR* homologue (*cneR*). The coding region was found to be 705 bp long and share 70 % similarity with *croR* of *C. rodentium*. Analysis of this protein reveals two signature domains, the autoinducer-binding domain and the C-terminal effector.

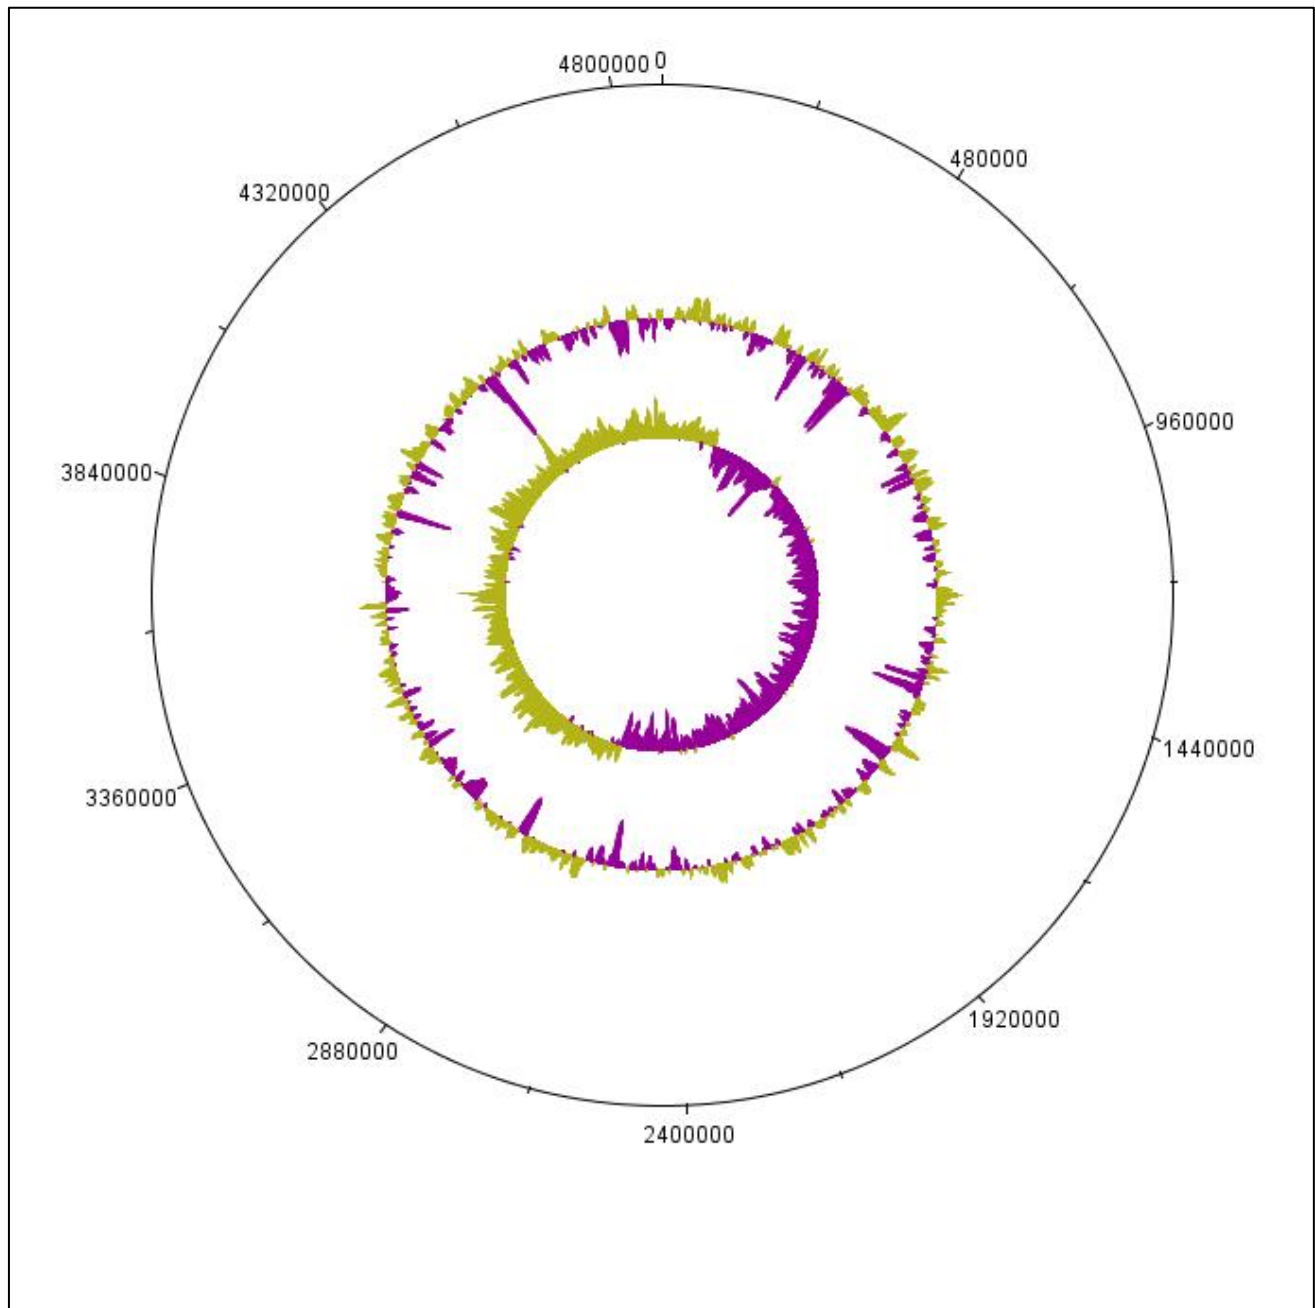

196

197 **Figure 7.** Whole genome representation of *C. neteri* SSMD04 genome using DNAPlotter. The  
 198 number on the outermost circle is the scale for the plot. The innermost circle represents GC skew,  
 199 while the second circle represents GC content.

200

Apart from that, a sequence potentially encoding an orphan *luxR* type receptor (723 bp) was also found within the genome. This *luxR* homologue shares 69% sequence homology to *luxR* homologue of *Enterobacter asburiae* L1.

#### 4. Discussion

*Cedecea* spp. are very rare bacteria and thus not well studied. Despite the evidence of their ability to infect human, their medical significance can be overlooked due the poor understanding of their physiology and etiology. Besides that, they are potentially challenging pathogens due to their resistance towards a wide range of antimicrobial agents, such as cephalothin, extended spectrum cephalosporins, colistin, and aminoglycosides (Mawardi et al., 2010; Abate, Qureshi & Mazumder, 2011; Dalamaga et al., 2008). To date, isolation of this species from non-clinical source has not been reported. Therefore, the isolation of *C. neteri* SSMD04 from a food source expands the current knowledge on diversity of the genus *Cedecea*.

Although employed by a wide range of Gram-negative bacteria in gene regulation that allows the alteration of behaviour on a population level (Waters & Basslers, 2005), AHL-type QS activities have not been reported in *C. neteri*. Some bacteria utilizes QS to regulate virulence and thus gaining advantage of expressing virulence factors only when the population density is large enough to triumph the hosts' immune system (Passador et al., 1993; Brint & Ohman, 1995; McClean et al., 1997; Thomson et al., 2000; Weeks et al., 2010). Given the understanding that *C. neteri* can act as human pathogen, it can be hypothesized that AHL-type QS activity in *C. neteri* is involved in the regulation of virulence factors. However, further studies on clinical as well as non-clinical strains would help in the solution of this hypothesis.

The whole genome sequence provides very valuable information in studying the genetic basis of QS in *C. neteri* SSMD04. The finding of *cneIR* in this genome, lying adjacent to each other, demonstrated a common feature of *luxIR* homologues (Brint & Ohman, 1995; Fuqua, Winans & Greenberg, 1994; Williamson et al., 2005). Analysis of amino acid sequence of the *cneIR* pair with InterPro agreed with their identity. The *cneIR* pair was found to be most similar to *croIR* in *C.*

*rodentium*. *C. rodentium* has been found to produce C4-HSL as the major AHL and C6-HSL as the minor (Coulthurst et al., 2007). *C. neteri* SSMD04 also produces C4-HSL, but it does not produce detectable level of C6.

The presence of lipase-positive *C. neteri* in marinated oily fish strongly suggests its role as a potential food spoilage agent, not only because of its ability to survive an extreme environment of high salinity and acidity, but also the fact that AHLs have long been associated with food spoilage via regulation of the proteolytic and lipolytic pathways (Skandamis & Nychas, 2012; Bruhn et al., 2004). Nevertheless, the roles of *C. neteri* in pathogenesis and food spoilage still require more information to be elucidated.

## 5. Conclusion

This study has confirmed the production of C4-HSL by *C. neteri* SSMD04 isolated from *Shime saba sashimi*. This is the first report of QS activity in *C. neteri*. However, the function of QS in *C. neteri* SSMD04 is still unknown. We hope that further studies coupled with the available genome information of *C. neteri* SSMD04 can help to elucidate the regulatory circuit of *C. neteri* SSMD04 by QS.

## 6. References

- Abate G, Qureshi S, and Mazumder SA. 2011. *Cedecea davisae* bacteremia in a neutropenic patient with acute myeloid leukemia. *J Infect* 63:83-85.
- Aziz RK, Devoid S, Disz T, Edwards RA, Henry CS, Olsen GJ, Olson R, Overbeek R, Parrello B, Pusch GD, Stevens RL, Vonstein V, and Xia F. 2012. SEED servers: high-performance access to the SEED genomes, annotations, and metabolic models. *PLoS One* 7:e48053.
- Bainton NJ, Stead P, Chhabra SR, Bycroft BW, Salmond GP, Stewart GS, and Williams P. 1992. *N*-(3-oxohexanoyl)-L-homoserine lactone regulates carbapenem antibiotic production in *Erwinia carotovora*. *Biochem J* 288 ( Pt 3):997-1004.
- Berman JJ. 2012. *Taxonomic guide to infectious diseases: understanding the biologic classes of pathogenic organisms*. Academic Press.

- Brenner DJ, Krieg NR, Staley JT, Garrity GM. 2005. Bergey's manual of systematic bacteriology, vol. 2. *The Proteobacteria, East Lansing, USA, 183.*
- Brint JM, and Ohman DE. 1995. Synthesis of multiple exoproducts in *Pseudomonas aeruginosa* is under the control of RhlR-RhII, another set of regulators in strain PAO1 with homology to the autoinducer-responsive LuxR-LuxI family. *J Bacteriol* 177:7155-7163.
- Bruhn JB, Christensen AB, Flodgaard LR, Nielsen KF, Larsen TO, Givskov M, and Gram L. 2004. Presence of acylated homoserine lactones (AHLs) and AHL-producing bacteria in meat and potential role of AHL in spoilage of meat. *Appl Environ Microbiol* 70:4293-4302.
- Carver T, Thomson N, Bleasby A, Berriman M, and Parkhill J. 2009. DNAPlotter: circular and linear interactive genome visualization. *Bioinformatics* 25:119-120.
- Chan KG, Tan KH, Yin WF, and Tan JY. 2014. Complete genome sequence of *Cedecea neteri* strain SSMD04, a bacterium isolated from pickled mackerel sashimi. *Genome Announc* 2.
- Chhabra SR, Philipp B, Eberl L, Givskov M, Williams P, and Camara M. 2005. Extracellular communication in bacteria. *Chemistry of Pheromones and Other Semiochemicals II* 240:279-315.
- Coulthurst SJ, Clare S, Evans TJ, Foulds IJ, Roberts KJ, Welch M, Dougan G, and Salmond GP. 2007. Quorum sensing has an unexpected role in virulence in the model pathogen *Citrobacter rodentium*. *EMBO Rep* 8:698-703.
- Dalamaga M, Karmaniolas K, Arsenis G, Pantelaki M, Daskalopoulou K, Papadavid E, and Migdalis I. 2008. *Cedecea lapagei* bacteremia following cement-related chemical burn injury. *Burns* 34:1205-1207.
- de Kievit TR, and Iglewski BH. 2000. Bacterial quorum sensing in pathogenic relationships. *Infect Immun* 68:4839-4849.
- Eberl L, Winson MK, Sternberg C, Stewart GS, Christiansen G, Chhabra SR, Bycroft B, Williams P, Molin S, and Givskov M. 1996. Involvement of *N*-acyl-L-homoserine lactone autoinducers in controlling the multicellular behaviour of *Serratia liquefaciens*. *Mol Microbiol* 20:127-136.
- Farmer JJ, 3rd, Sheth NK, Hudzinski JA, Rose HD, and Asbury MF. 1982. Bacteremia due to *Cedecea neteri* sp. nov. *J Clin Microbiol* 16:775-778.
- Fuqua C, Winans SC, and Greenberg EP. 1996. Census and consensus in bacterial ecosystems: the LuxR-LuxI family of quorum-sensing transcriptional regulators. *Annu Rev Microbiol* 50:727-751.
- Gould TA, Schweizer HP, and Churchill ME. 2004. Structure of the *Pseudomonas aeruginosa* acyl-homoserinelactone synthase LasI. *Mol Microbiol* 53:1135-1146.



- 292 Grimont PAD, Grimont F, Farmer JJ, 3rd, Asbury MA. 1981. *Cedecea davisae* gen. nov., sp. nov.  
293 and *Cedecea lapagei* sp. nov., New Enterobacteriaceae from clinical specimens. *Int. J. Syst.*  
294 *Bacteriol.* 31:317-326.
- 295 Hastings JW, and Nealson KH. 1977. Bacterial bioluminescence. *Annu Rev Microbiol* 31:549-595.
- 296 Hao Y, Winans SC, Glick BR, and Charles TC. 2010. Identification and characterization of new  
297 LuxR/LuxI-type quorum sensing systems from metagenomic libraries. *Environ Microbiol*  
298 12:105-117.
- 299 Jang EB and Nishijima KA. 1990. Identification and attractancy of bacteria associated with *Dacus*  
300 *dorsalis* (Diptera: Tephritidae). *Environm. Entomol.* 19:1726-1731.
- 301 Lau YY, Sulaiman J, Chen JW, Yin WF, and Chan KG. 2013. Quorum sensing activity of  
302 *Enterobacter asburiae* isolated from lettuce leaves. *Sensors (Basel)* 13:14189-14199.
- 303 Mawardi H, Pavlakis M, Mandelbrot D, and Woo SB. 2010. Sirolimus oral ulcer with *Cedecea*  
304 *davisae* superinfection. *Transpl Infect Dis* 12:446-450.
- 305 McClean KH, Winson MK, Fish L, Taylor A, Chhabra SR, Camara M, Daykin M, Lamb JH, Swift S,  
306 Bycroft BW, Stewart GS, and Williams P. 1997. Quorum sensing and *Chromobacterium*  
307 *violaceum*: exploitation of violacein production and inhibition for the detection of *N*-  
308 acylhomoserine lactones. *Microbiology* 143 ( Pt 12):3703-3711.
- 309 Miller MB, and Bassler BL. 2001. Quorum sensing in bacteria. *Annu Rev Microbiol* 55:165-199.
- 310 Mitchell A, Chang HY, Daugherty L, Fraser M, Hunter S, Lopez R, McAnulla C, McMenamin C,  
311 Nuka G, Pesseat S, Sangrador-Vegas A, Scheremetjew M, Rato C, Yong SY, Bateman A,  
312 Punta M, Attwood TK, Sigrist CJ, Redaschi N, Rivoire C, Xenarios I, Kahn D, Guyot D,  
313 Bork P, Letunic I, Gough J, Oates M, Haft D, Huang H, Natale DA, Wu CH, Orengo C,  
314 Sillitoe I, Mi H, Thomas PD, and Finn RD. 2015. The InterPro protein families database: the  
315 classification resource after 15 years. *Nucleic Acids Res* 43:D213-221.
- 316 Ortori CA, Dubern JF, Chhabra SR, Camara M, Hardie K, Williams P, and Barrett DA. 2011.  
317 Simultaneous quantitative profiling of *N*-acyl-L-homoserine lactone and 2-alkyl-4(1H)-  
318 quinolone families of quorum-sensing signaling molecules using LC-MS/MS. *Anal Bioanal*  
319 *Chem* 399:839-850.
- 320 Osterblad M, Pensala O, Peterzens M, Helenius H, and Huovinen P. 1999. Antimicrobial  
321 susceptibility of Enterobacteriaceae isolated from vegetables. *J Antimicrob Chemother*  
322 43:503-509.
- 323 Passador L, Cook JM, Gambello MJ, Rust L, and Iglewski BH. 1993. Expression of *Pseudomonas*  
324 *aeruginosa* virulence genes requires cell-to-cell communication. *Science* 260:1127-1130.

- 325 Pearson JP, Van Delden C, and Iglewski BH. 1999. Active efflux and diffusion are involved in
- 326 transport of *Pseudomonas aeruginosa* cell-to-cell signals. *J Bacteriol* 181:1203-1210.
- 327 Salmond GP, Bycroft BW, Stewart GS, and Williams P. 1995. The bacterial 'enigma': cracking the
- 328 code of cell-cell communication. *Mol Microbiol* 16:615-624.
- 329 Schauder S, and Bassler BL. 2001. The languages of bacteria. *Genes Dev* 15:1468-1480.
- 330 Schauder S, Shokat K, Surette MG, and Bassler BL. 2001. The LuxS family of bacterial
- 331 autoinducers: biosynthesis of a novel quorum-sensing signal molecule. *Mol Microbiol*
- 332 41:463-476.
- 333 Skandamis PN, and Nychas GJ. 2012. Quorum sensing in the context of food microbiology. *Appl*
- 334 *Environ Microbiol* 78:5473-5482.
- 335 Tamura K, Stecher G, Peterson D, Filipski A, and Kumar S. 2013. MEGA6: Molecular Evolutionary
- 336 Genetics Analysis version 6.0. *Mol Biol Evol* 30:2725-2729.
- 337 Thomson NR, Crow MA, McGowan SJ, Cox A, and Salmond GP. 2000. Biosynthesis of carbapenem
- 338 antibiotic and prodigiosin pigment in *Serratia* is under quorum sensing control. *Mol*
- 339 *Microbiol* 36:539-556.
- 340 Waters CM, and Bassler BL. 2005. Quorum sensing: cell-to-cell communication in bacteria. *Annu*
- 341 *Rev Cell Dev Biol* 21:319-346.
- 342 Watson WT, Minogue TD, Val DL, von Bodman SB, and Churchill ME. 2002. Structural basis and
- 343 specificity of acyl-homoserine lactone signal production in bacterial quorum sensing. *Mol*
- 344 *Cell* 9:685-694.
- 345 Weeks JN, Galindo CL, Drake KL, Adams GL, Garner HR, and Ficht TA. 2010. *Brucella melitensis*
- 346 VjbR and C12-HSL regulons: contributions of the *N*-dodecanoyl homoserine lactone
- 347 signaling molecule and LuxR homologue VjbR to gene expression. *BMC Microbiol* 10:167.
- 348 Williams P, Winzer K, Chan WC, and Camara M. 2007. Look who's talking: communication and
- 349 quorum sensing in the bacterial world. *Philos Trans R Soc Lond B Biol Sci* 362:1119-1134.
- 350 Williamson LL, Borlee BR, Schloss PD, Guan C, Allen HK, and Handelsman J. 2005. Intracellular
- 351 screen to identify metagenomic clones that induce or inhibit a quorum-sensing biosensor.
- 352 *Appl Environ Microbiol* 71:6335-6344.
- 353 Winson MK, Swift S, Fish L, Throup JP, Jorgensen F, Chhabra SR, Bycroft BW, Williams P, and
- 354 Stewart GS. 1998. Construction and analysis of *luxCDABE*-based plasmid sensors for
- 355 investigating *N*-acyl homoserine lactone-mediated quorum sensing. *FEMS Microbiol Lett*
- 356 163:185-192.
- 357
